# Supplementary material for: Proteomic approaches for profiling negative fertility markers in inferior boar spermatozoa
Source: PubMed Central journal article supplement (PMC4562270; doi:10.1038/srep13821), 2015-09-08

**Supplementary data**

**Proteomic approaches for profiling negative fertility markers in inferior  
boar spermatozoa**

Woo-Sung Kwon, Shin-Ae Oh, Ye-Ji Kim, Md Saidur Rahman, Young-Ah You, and Myung-  
Geol Pang

**Supplementary information includes:**

Supplementary Figure S1

**Supplementary Figure S1. Two-D electrophoretic separation of sperm proteins from the small and large litter size spermatozoa.** S-1, S-2 and S-3 are small litter size, and L-1, L-2 and L-3 are large litter size. Proteins from  $5 \times 10^6$  cells were loaded onto each gel. The apparent molecular weights are indicated down the side, and the pH range across the lower end of the gels. All experiments carried out three replications. Spots showing include increased/decreased or missing protein expression in small and large litter size gels. 25 difference spots are indicated arrows.

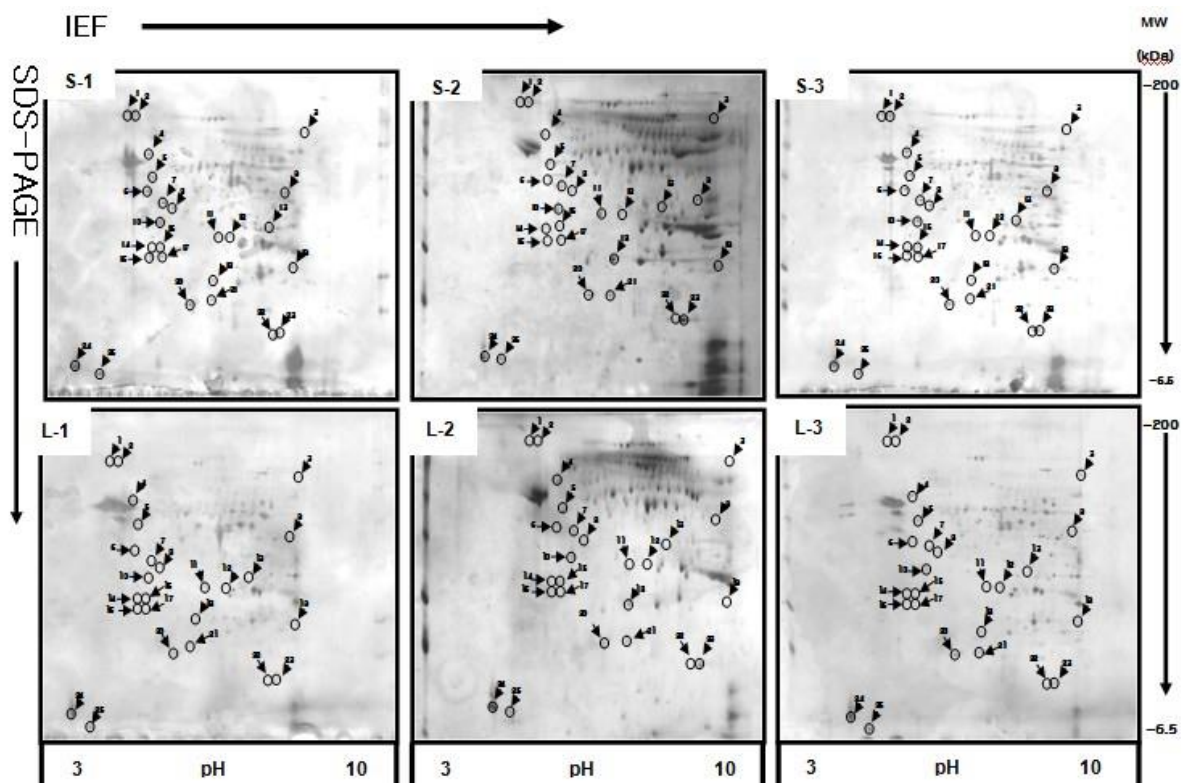

Supplement: srep13821-s1.pdf [file srep13821-s1.pdf]
